# Supplementary material for: Genomic tools development for Aquilegia: construction of a BAC-based physical map
Source: BMC Genomics. 2010 Nov 8;11:621. doi: 10.1186/1471-2164-11-621 (PMC3091760; doi:10.1186/1471-2164-11-621)
Supplement: Additional file 3 — Spread sheet of the detail sequence information of the overgo probes used in this study. The probes with the nomenclature of Aq_SR_ctg and AHOTEg were derived from drought stress ESTs, while the TC probes were from a list of genes potentially involved in anthocyanin biosynthesis or floral development. To generate the probes, marker sequences were processed through a pipeline composed of RepeatMasker, Cross-Match and Tandem Repeat Finder to remove low complex sequence regions before screening for overgo oligomers by OligoSpawn. [file 1471-2164-11-621-S3.XLS]

## Sheet: Sheet1
Additional file 3: Sequences of overgo probes used in this study
Overgo marker	Sequence
Aq_SR_ctg_1-Ova	CGTCATCCAACTTGACGGTGTCAA
Aq_SR_ctg_1-OVb	TGTTACTCCACCTCCATTGACACC
Aq_SR_ctg_2-Ova	ATGCCAACCGGAAAAGAAGCACAG
Aq_SR_ctg_2-OVb	CCCGGGACTATATATGCTGTGCTT
Aq_SR_ctg_4-Ova	AACAACATCCAGCCCATTGCACTC
Aq_SR_ctg_4-OVb	TAGACGCCAATTCTGCGAGTGCAA
Aq_SR_ctg_5-Ova	CCAGGGAAAACCTTAGCAGAAGTG
Aq_SR_ctg_5-OVb	AGCCTCCAATTCGTTGCACTTCTG
Aq_SR_ctg_6-Ova	ATGGTGCTGCTATGTCAACGTGCA
Aq_SR_ctg_6-OVb	GTAAGAACACGTGCTGTGCACGTT
Aq_SR_ctg_7-Ova	GCACAGATCTAGCTCTTGCTAGAC
Aq_SR_ctg_7-OVb	ACTGCCTTAACAGTGAGTCTAGCA
Aq_SR_ctg_8-Ova	TTTCCAAGAGCTGCTGAGGATCTC
Aq_SR_ctg_8-OVb	TACACACACACCAAGGGAGATCCT
Aq_SR_ctg_9-Ova	CACCAATATTCTGGCCTTCTCTGG
Aq_SR_ctg_9-OVb	AAGCGCGCAAAACTACCCAGAGAA
Aq_SR_ctg_10-Ova	TGTTGCCACATACTCCTGACCATG
Aq_SR_ctg_10-OVb	GAAAAACCTAGCGGGACATGGTCA
Aq_SR_ctg_12-Ova	GCCATTGTCTGATAGGCTCTATGG
Aq_SR_ctg_12-OVb	CAGAGGAACAAGAGTGCCATAGAG
Aq_SR_ctg_13-Ova	AAGTACTAAAGGGGGGGGGATCAG
Aq_SR_ctg_13-OVb	CCCAAAACTCCTCAAGCTGATCCC
Aq_SR_ctg_14-Ova	AGCTGGTGAGATAGGTGGTGATTC
Aq_SR_ctg_14-OVb	ACCAACGGCTGCAAATGAATCACC
Aq_SR_ctg_16-Ova	CACGAATTCCAGCTCCTTCCCATC
Aq_SR_ctg_16-OVb	TGGGAAGAATGGATGGGATGGGAA
Aq_SR_ctg_17-Ova	TTTTTCTGGTGCCTCGCTGAACAC
Aq_SR_ctg_17-OVb	GAGAGAGAGAGAGAGAGTGTTCAG
Aq_SR_ctg_18-Ova	ACTCCCTCCTCAAGAAGCATCTGA
Aq_SR_ctg_18-OVb	GAGTGTGGCACTTTGATCAGATGC
Aq_SR_ctg_20-Ova	ACTCTTCATCCTCGTCTTCGTCTG
Aq_SR_ctg_20-OVb	CCTGATAGTCAGGTTGCAGACGAA
Aq_SR_ctg_22-Ova	CAAGACCCCAATCTGTCCATCTTG
Aq_SR_ctg_22-OVb	GAGGTCCAAAGTGAACCAAGATGG
Aq_SR_ctg_23-Ova	GTGGCAAGTTGTTTCCATCCCTTC
Aq_SR_ctg_23-OVb	ACTGGTGTCTGCTATGGAAGGGAT
Aq_SR_ctg_25-Ova	TCGGCGTTTGGATGAATCTCACAG
Aq_SR_ctg_25-OVb	CTCCAATTCTCCCCATCTGTGAGA
Aq_SR_ctg_26-Ova	CTTGAGTTGCACCTGAAGCCTTGT
Aq_SR_ctg_26-OVb	GCTCAAGCTGCAAAAGACAAGGCT
Aq_SR_ctg_30-Ova	TCACACCCTTGAGATCCACATCTG
Aq_SR_ctg_30-OVb	CCAGAAGCTGAACTCACAGATGTG
Aq_SR_ctg_31-Ova	CCATCCCCAATGATTTCTACCTTC
Aq_SR_ctg_31-OVb	TCCCTGACACTTTCGAGAAGGTAG
Aq_SR_ctg_33-Ova	GGCAGGCAATTGAACTTGAGCTTC
Aq_SR_ctg_33-OVb	GAGTCATCTCGGATGTGAAGCTCA
Aq_SR_ctg_34-Ova	GTGAGCAATTTCTGGCACCAATGG
Aq_SR_ctg_34-OVb	CCCAAATCCTGATGACCCATTGGT
Aq_SR_ctg_36-Ova	AGTGTAAGGCAAGGTGTGCCAAAG
Aq_SR_ctg_36-OVb	CGATCCATGTATCCTGCTTTGGCA
Aq_SR_ctg_37-Ova	GGACAGCTAATGCTGTTGGTAAGG
Aq_SR_ctg_37-OVb	AGCACCACTATCTCCACCTTACCA
Aq_SR_ctg_38-Ova	GCAACGCCATTATCGTTCGATCTC
Aq_SR_ctg_38-OVb	GAGAGAGAGAGAGAGAGAGATCGA
Aq_SR_ctg_39-Ova	GCCACATCCACATATCCCATCTTC
Aq_SR_ctg_39-OVb	CTTACTTTGGAGGTGGGAAGATGG
Aq_SR_ctg_40-Ova	AATTCGAACCAGCACCACCAACTG
Aq_SR_ctg_40-OVb	TTGGTGAAGACAGGGACAGTTGGT
Aq_SR_ctg_42-Ova	TAGGTCTCAATAGGCCTCCCAGAC
Aq_SR_ctg_42-OVb	GAGGTTCTCCTAAGACGTCTGGGA
Aq_SR_ctg_43-Ova	CAACAGCACCACCAATGGTTAGAG
Aq_SR_ctg_43-OVb	TATGTACACCACTGGCCTCTAACC
Aq_SR_ctg_44-Ova	ACCATGGATGAAGCGAAAGCGATC
Aq_SR_ctg_44-OVb	AAAGCGTGGACGCTTTGATCGCTT
Aq_SR_ctg_45-Ova	GGGATGAACTCATTGGGTTTGTCC
Aq_SR_ctg_45-OVb	GGGATCCCGAAATATGGGACAAAC
Aq_SR_ctg_47-Ova	GGAGAATTCATCACGGAGATACGC
Aq_SR_ctg_47-OVb	TGCTCAACCTCCTTAGGCGTATCT
Aq_SR_ctg_48-Ova	TCTGGGCACATTCCATGACTCATC
Aq_SR_ctg_48-OVb	AGCTCATGGAGTACAAGATGAGTC
Aq_SR_ctg_50-Ova	TTATCGAGTGCTACGCGTTTGGTG
Aq_SR_ctg_50-OVb	CTCCTAATGGTGATGGCACCAAAC
Aq_SR_ctg_51-Ova	CCCCTTTGGTTCTATGGGCAGTAT
Aq_SR_ctg_51-OVb	GTCCTTGACATCCTTGATACTGCC
Aq_SR_ctg_53-Ova	ATCTGAACTCCTCCACCTGACAAG
Aq_SR_ctg_53-OVb	GGCACCATAACCATTCCTTGTCAG
Aq_SR_ctg_55-Ova	TGTTGCCACATACTCCTGACCATG
Aq_SR_ctg_55-OVb	GAAAAACCTAGCGGGACATGGTCA
Aq_SR_ctg_57-Ova	TCACACACACACTCAGCAATCAGC
Aq_SR_ctg_57-OVb	ATGGACCATCTGCTGTGCTGATTG
Aq_SR_ctg_59-Ova	TGTTTGGACACTGCTGGCAATACC
Aq_SR_ctg_59-OVb	CCTCAGTATAGGCTTGGGTATTGC
Aq_SR_ctg_61-Ova	CTTGAATGAGCGTCCTCAGCCTAG
Aq_SR_ctg_61-OVb	AACTCCTTTACCAGGCCTAGGCTG
Aq_SR_ctg_62-Ova	CCCTCGACCAATGTTAATGACAAC
Aq_SR_ctg_62-OVb	ATTGGGCAAAGACGGAGTTGTCAT
Aq_SR_ctg_63-Ova	CCCCTGATCACCTAATTGACCATG
Aq_SR_ctg_63-OVb	GATCTCGACTGTAGGTCATGGTCA
Aq_SR_ctg_64-Ova	GCACCCATGTAGACAACAAGCAAC
Aq_SR_ctg_64-OVb	CTATCTCCCATCCAGAGTTGCTTG
Aq_SR_ctg_65-Ova	CTATGGTGGAAGGGAAATTGTGCG
Aq_SR_ctg_65-OVb	GTCCCGCTAGGTTTTTCGCACAAT
Aq_SR_ctg_67-Ova	TTGCAGCCAAGTAGGACTTCAGCT
Aq_SR_ctg_67-OVb	ATTGAAGCAGTCCCTGAGCTGAAG
Aq_SR_ctg_68-Ova	ACTGGACCTGATCAACAGATAGGC
Aq_SR_ctg_68-OVb	CCTGAAAAGAAGAGGCGCCTATCT
Aq_SR_ctg_69-Ova	GTATCTAGTCCCAGCTGACTTGAC
Aq_SR_ctg_69-OVb	GACAAACTGCCCAACTGTCAAGTC
Aq_SR_ctg_70-Ova	GTATCGGGACTTATCGGTGCAGTA
Aq_SR_ctg_70-OVb	CCATGTGACCTACGATTACTGCAC
Aq_SR_ctg_71-Ova	ATGCCATTCGGAACCAAGGGAATG
Aq_SR_ctg_71-OVb	GCTCTCAACAACCTTCCATTCCCT
Aq_SR_ctg_72-Ova	CTGTTGCTCTTACTGCTGCACCAC
Aq_SR_ctg_72-OVb	GTTGCAACACAAGGTGGTGGTGCA
Aq_SR_ctg_75-Ova	GGAACCCAATACCAAGATAGCCTC
Aq_SR_ctg_75-OVb	GTACGCCAGATAGAAGGAGGCTAT
Aq_SR_ctg_76-Ova	CGGTTCTTTCCAGTCTTGAACCTC
Aq_SR_ctg_76-OVb	AGTCTCGTTTGGAGGAGAGGTTCA
Aq_SR_ctg_77-Ova	TCCCTGCAAACTCTGTCGATTCTG
Aq_SR_ctg_77-OVb	GCTACCACTATTGGTCCAGAATCG
Aq_SR_ctg_78-Ova	CACTGGACAACCAGAAATGGAACC
Aq_SR_ctg_78-OVb	AGCCCCTAAAGCTAGTGGTTCCAT
Aq_SR_ctg_79-Ova	GTAGTGGAAGCATTCCTTCAGCTG
Aq_SR_ctg_79-OVb	TCACACTACCCTAGTGCAGCTGAA
Aq_SR_ctg_81-Ova	TGTTGCCACATACTCCTGACCATG
Aq_SR_ctg_81-OVb	GAAAGACCTAGCGGGACATGGTCA
Aq_SR_ctg_85-Ova	CTGTTTGTTACCACCATCAATGCG
Aq_SR_ctg_85-OVb	CTTCTGGAGCTGTTCTCGCATTGA
Aq_SR_ctg_86-Ova	CCATACCCTTGCACATGTTAGGAG
Aq_SR_ctg_86-OVb	GGTTGTGAACGTTGTCCTCCTAAC
Aq_SR_ctg_87-Ova	CTCAGAAGAAGTCGACGAATGCAG
Aq_SR_ctg_87-OVb	GGCTTTCTCGACTGTACTGCATTC
Aq_SR_ctg_88-Ova	TTAGAGATCCGTGTCCACACCCAA
Aq_SR_ctg_88-OVb	CAAAGCATCCTGGATCTTGGGTGT
Aq_SR_ctg_89-Ova	CAGCCTAGTGAGAACTTGATCAGC
Aq_SR_ctg_89-OVb	TGCCGACAAAGCTCATGCTGATCA
Aq_SR_ctg_90-Ova	GAGCATTGGGACTGTTGACATACG
Aq_SR_ctg_90-OVb	AATCCAAGCCTTAGCCCGTATGTC
Aq_SR_ctg_91-Ova	CAAGAGCAGCTCCAATGAATGGTC
Aq_SR_ctg_91-OVb	TGGGTTTTCTGGGTTGGACCATTC
Aq_SR_ctg_92-Ova	CACATAGTGTCTCCACTGCACTTC
Aq_SR_ctg_92-OVb	CTCATGCTTGGAATGGGAAGTGCA
Aq_SR_ctg_93-Ova	CACACTTCACCTGTTGTGCCTCTG
Aq_SR_ctg_93-OVb	GAACTCTCGTTTCGTGCAGAGGCA
Aq_SR_ctg_94-Ova	TCACAGGTACAGTTGGATCCACAC
Aq_SR_ctg_94-OVb	CTGAAGGTGGATGCAAGTGTGGAT
Aq_SR_ctg_95-Ova	AGTGTCGCCATGGTATTTGCTGTG
Aq_SR_ctg_95-OVb	CAATGTCCATGCCTACCACAGCAA
Aq_SR_ctg_97-Ova	ACGCCCCAGATAACCTTGGAGTTG
Aq_SR_ctg_97-OVb	CCACTCCTTGTCATTCCAACTCCA
Aq_SR_ctg_98-Ova	CACCACCCCTTTAGAAGCAATAGG
Aq_SR_ctg_98-OVb	CAGCAGGTTTGAACCTCCTATTGC
Aq_SR_ctg_99-Ova	GCCGCTCAAACAATCTCTTGAACC
Aq_SR_ctg_99-OVb	CCAGTAGTGAAATCTAGGTTCAAG
Aq_SR_ctg_101-Ova	CATAGCAACCCATGTCGATGCAAG
Aq_SR_ctg_101-OVb	CTGTTGGTCCAATCACCTTGCATC
Aq_SR_ctg_102-Ova	CGGCGTAAATGATTCCAGGGAGAT
Aq_SR_ctg_102-OVb	CTGACTATCTTTGGGTATCTCCCT
Aq_SR_ctg_103-Ova	TGTTGCCACATACTCCTGACCATG
Aq_SR_ctg_103-OVb	GAAAAACCTAGCGGGACATGGTCA
Aq_SR_ctg_104-Ova	GTAGTGGAAGCATTCCTTCAGCTG
Aq_SR_ctg_104-OVb	TCACACTACCCTAGTGCAGCTGAA
Aq_SR_ctg_105-Ova	ATAGTTGACCTGGCCATCACCATC
Aq_SR_ctg_105-OVb	CCGAGAAGCAGATGTTGATGGTGA
Aq_SR_ctg_109-Ova	GACACTTAGCATGACCATGCTTGC
Aq_SR_ctg_109-OVb	TCCACCTCCAAAACTGGCAAGCAT
Aq_SR_ctg_110-Ova	GATAGGAAGACAAGGAAGTTTGGC
Aq_SR_ctg_110-OVb	CCTCTACACCTTCACTGCCAAACT
Aq_SR_ctg_111-Ova	GTTGATAGTGGATGCCAAGTGTAC
Aq_SR_ctg_111-OVb	GGTCGTGGAGATCTTTGTACACTT
Aq_SR_ctg_113-Ova	GTCGTCCCTTCAGAATTCGGTATC
Aq_SR_ctg_113-OVb	TTGGATGTGTGCAAAGGATACCGA
Aq_SR_ctg_114-Ova	CAATCAGCTGTTGACGTGTGTTCG
Aq_SR_ctg_114-OVb	GTGTTCGGTCGTTTGTCGAACACA
Aq_SR_ctg_116-Ova	CTAACCATACTCGTGCACCATGTC
Aq_SR_ctg_116-OVb	ATTCGTGATTCAGCGCGACATGGT
Aq_SR_ctg_117-Ova	CACCAGGAAGAACAAGACGAACAG
Aq_SR_ctg_117-OVb	CGGGAGATTCAAACTGCTGTTCGT
Aq_SR_ctg_118-Ova	GTTGGGGTCCACTTAAAGATGCAG
Aq_SR_ctg_118-OVb	TCATCGGATGGTCTAGCTGCATCT
Aq_SR_ctg_120-Ova	CTGCTTTACGCCATGGAGGGAGAT
Aq_SR_ctg_120-OVb	AAGAAGAAAGGTATGCATCTCCCT
Aq_SR_ctg_122-Ova	CAACTGTGATTGCGCTGACAAGAG
Aq_SR_ctg_122-OVb	CTTCTTCACACACTGGCTCTTGTC
Aq_SR_ctg_124-Ova	ATCCTCTGGAAACGGAAAGGCATC
Aq_SR_ctg_124-OVb	GGCTCATCGTAGAGTTGATGCCTT
Aq_SR_ctg_125-Ova	CTTAAATGCCGGCAGAGACACAAC
Aq_SR_ctg_125-OVb	GGAAAGAGTGGTAGCTGTTGTGTC
Aq_SR_ctg_127-Ova	GGGATCCTTGACAATAGTAACTGG
Aq_SR_ctg_127-OVb	CACAAATGCTGCTTGCCCAGTTAC
Aq_SR_ctg_128-Ova	TCACCGTTGGATCAAGATCCAACG
Aq_SR_ctg_128-OVb	ACTTCACCAGCATCGTCGTTGGAT
Aq_SR_ctg_129-Ova	GTCCTTGATAGGGTAGGAAGCTTC
Aq_SR_ctg_129-OVb	ATGCGGTATTGCCATGGAAGCTTC
Aq_SR_ctg_130-Ova	CAACAGCACCACCAATGGTTAGAG
Aq_SR_ctg_130-OVb	TATGTACACCACTGGCCTCTAACC
Aq_SR_ctg_131-Ova	AGCACATGGGAAGTAGCAGATGCA
Aq_SR_ctg_131-OVb	CTTCCCAGCTCATAAGTGCATCTG
Aq_SR_ctg_132-Ova	GGTGCAATCACGAGTTGATAGACC
Aq_SR_ctg_132-OVb	CAGCCATCTCTGCATTGGTCTATC
Aq_SR_ctg_133-Ova	AATATGGCAGGAGTCGGACCATTG
Aq_SR_ctg_133-OVb	GTTCCCAATCCTGAGTCAATGGTC
Aq_SR_ctg_134-Ova	CAGCCATCGAAGCTTTCTCAACAG
Aq_SR_ctg_134-OVb	TCAAATATGGCTGGCCCTGTTGAG
Aq_SR_ctg_135-Ova	AAAACTTGTGAGGGGGACATCAGG
Aq_SR_ctg_135-OVb	TTGCAGTGAGGTAAGGCCTGATGT
Aq_SR_ctg_138-Ova	ACCTTTATGGGCTGGATCAACACC
Aq_SR_ctg_138-OVb	GGACTATGGTGTAGGTGGTGTTGA
Aq_SR_ctg_139-Ova	CAACAGCACCACCAATGGTTAGAG
Aq_SR_ctg_139-OVb	TATGTACACCACTGGCCTCTAACC
Aq_SR_ctg_140-Ova	CACTTCTAGGCCTCATGTTAAGGC
Aq_SR_ctg_140-OVb	AATGTCCTCCCACCAAGCCTTAAC
Aq_SR_ctg_143-Ova	CCAAGCCAAACAAGGTTTCAAAAG
Aq_SR_ctg_143-OVb	TCCGATTGCTGGTGATCTTTTGAA
Aq_SR_ctg_144-Ova	GTTGATGCTGCTGTTGGGAAGTAC
Aq_SR_ctg_144-OVb	TGTTGGAGAAAGGGGAGTACTTCC
Aq_SR_ctg_145-Ova	CCGGAATTATTCAGGGCGAACTAG
Aq_SR_ctg_145-OVb	TCGTTCAGGTCCGATTCTAGTTCG
Aq_SR_ctg_146-Ova	GTTTCTGCTCTTGCACTTGCCATC
Aq_SR_ctg_146-OVb	TCCAGCAGGAGAGAATGATGGCAA
Aq_SR_ctg_148-Ova	GTTGAATAACCTGGCCTAGCTCTG
Aq_SR_ctg_148-OVb	ACTGTTGTTCAGGACCCAGAGCTA
Aq_SR_ctg_149-Ova	TGAGGCCTGATTTCCATGTTGCTG
Aq_SR_ctg_149-OVb	ACCCAGCAATTTTGCGCAGCAACA
Aq_SR_ctg_150-Ova	GGAAAGAGGCACAACATCAGGATG
Aq_SR_ctg_150-OVb	CATGGCGCGTCAATACCATCCTGA
Aq_SR_ctg_151-Ova	GACCACAATTCCATCATCATCCTC
Aq_SR_ctg_151-OVb	GGAGGAGATAGATGCAGAGGATGA
Aq_SR_ctg_152-Ova	ACTCCTCGAGGATATGATCGCCAA
Aq_SR_ctg_152-OVb	AAGGGGGAGTAGAGTATTGGCGAT
Aq_SR_ctg_153-Ova	CCGAATGGACCTATTGTTCCATGG
Aq_SR_ctg_153-OVb	ACACCACCCACATAGTCCATGGAA
Aq_SR_ctg_154-Ova	ACACCACCCACATAGTCCATGGAA
Aq_SR_ctg_154-OVb	CCGAATGGACCTATTGTTCCATGG
Aq_SR_ctg_156-Ova	CAATTCTAGGCCTCATGTTAAGGC
Aq_SR_ctg_156-OVb	AACAGCTTCCCACCAAGCCTTAAC
Aq_SR_ctg_157-Ova	TCTGCAGGGATTGAAGGAGATCCT
Aq_SR_ctg_157-OVb	GCTGGAACTTATGGAGAGGATCTC
Aq_SR_ctg_158-Ova	ATGCAACTTCCCAGGACCTGAATG
Aq_SR_ctg_158-OVb	CAGGACATATCAGCTGCATTCAGG
Aq_SR_ctg_159-Ova	GCCACCACTGATAACTTCCCTTTC
Aq_SR_ctg_159-OVb	GAACTGAAGAAGGAAGGAAAGGGA
Aq_SR_ctg_161-Ova	GAATGACGTAGTCGACTATGGCTC
Aq_SR_ctg_161-OVb	AATTGGAGGATGGCCAGAGCCATA
Aq_SR_ctg_162-Ova	GTGATATCATCCCACCATGCACTC
Aq_SR_ctg_162-OVb	GGGACAGGAAGAATGTGAGTGCAT
Aq_SR_ctg_163-Ova	GGAAAAAGGACGTCACCAGGTTGA
Aq_SR_ctg_163-OVb	TTGGGCTTTGGACTCATCAACCTG
Aq_SR_ctg_165-Ova	TTTCCTTGCAGGGAGATCGTCATG
Aq_SR_ctg_165-OVb	TCCTTACAACCGTCCTCATGACGA
Aq_SR_ctg_166-Ova	TCAAAACGCTTCAGCAGGACATAG
Aq_SR_ctg_166-OVb	AGAACTGGTGAGTGACCTATGTCC
Aq_SR_ctg_167-Ova	AAACAGGGCAACCAGAAACAGACC
Aq_SR_ctg_167-OVb	GCCTCTACCACTACTAGGTCTGTT
Aq_SR_ctg_168-Ova	GTCTGCAACACTAAGAATCCAAGC
Aq_SR_ctg_168-OVb	AAGAGTTATGGGCTGGGCTTGGAT
Aq_SR_ctg_169-Ova	TCATCGCTTCCTCCTTGGACTTAC
Aq_SR_ctg_169-OVb	TGGAAGGCAGTTGAAGGTAAGTCC
AHOTEg_001a_A10_.g1-Ova	AAGAATCATCAAGAGCAACCTGGA
AHOTEg_001a_A10_.g1-Ovb	GTGGCTCAAGATGGTTTCCAGGTT
TC16704-Ova	AGGAACCTTGCTCAGAAGTCTGTG
TC16704-Ovb	AGGTTGCTACGATTGCCACAGACT
TC17278-Ova	GCAAATATCAGGGCTGTGAGTGTG
TC17278-Ovb	AGGCTTTGCCTTCCTCCACACTCA
TC17666-Ova	ACCACTATACGGCCATATAGCCTC
TC17666-Ovb	CCATGACGGTGTTCTTGAGGCTAT
TC17736-Ova	GGTGAGGAACAAGGCAATGGGAAC
TC17736-Ovb	CAGCTAAAGATGCTGGGTTCCCAT
TC8132-Ova	CTGGGTAGAGTAAATTTTTGAGGC
TC8132-Ovb	TACAACAACGCCTCTCGCCTCAAA
TC8191-Ova	CGCTTTTTGAAGGGATGTGCCTAG
TC8191-Ovb	ATGCTCAGCTGGAGATCTAGGCAC
TC8306-Ova	GGGGTTTCAGGGTTTTAGAAGATT
TC8306-Ovb	CTTGGGTTTATCTCTAAATCTTCT
TC8318-Ova	GTTGCCATCGTTACTACTACATAC
TC8318-Ovb	CAGCACATTGCAGTGTGTATGTAG
TC8340-Ova	CGAATACCACTACTGGATCATCCC
TC8340-Ovb	GAAGAAGTATCCGGTGGGGATGAT
TC8423-Ova	CGGCTTACCATTATTCACATCCAC
TC8423-Ovb	AGCCTTTCAACAAGTGGTGGATGT
TC8452-Ova	ACAGGACTCGAATCATAAACTTGG
TC8452-Ovb	GAGACTGTATTTGTGGCCAAGTTT
TC8499-Ova	GCATGTGATAAGGGGTGAAGTTAC
TC8499-Ovb	ACGCTACCTGGACAATGTAACTTC
TC8563-Ova	TCATCATGAGTTAGGGTTTCCCAA
TC8563-Ovb	CTCAAGATAATCGTCATTGGGAAA
TC8645-Ova	AGAATTGTGCAGCGCTCTATTATC
TC8645-Ovb	CGAAAACTGACAGGGTGATAATAG
TC8669-Ova	CAAGTCAGTACCGATAATCTGTTG
TC8669-Ovb	TAAACCCATCCGAAGCCAACAGAT
TC8742-Ova	GTGGGAACTGTGACAAGTGGAATC
TC8742-Ovb	GTGTGGTACTTGGATCGATTCCAC
TC8782-Ova	GGTCGAAGTTGTCTTCCCCAAATA
TC8782-Ovb	CTGGAGGTGGAAATCTTATTTGGG
TC8815-Ova	GGAGGTTGTCGAGATTCTGTCCAA
TC8815-Ovb	GTATTCCGGGAAGAATTTGGACAG
TC8849-Ova	CTGCCACTTTGTGTTGCTGCTATC
TC8849-Ovb	ACGCAAACATTCCTACGATAGCAG
TC8890-Ova	TACTGGGTGGCATCTATGCTGGAA
TC8890-Ovb	GTTATGCCAGAGGCATTTCCAGCA
TC9024-Ova	ATGATGCATCCACATAGTTCCATC
TC9024-Ovb	CGGTGTACAATTGATGGATGGAAC
TC9132-Ova	GCACCCCTTTCTGAATGAATCTGT
TC9132-Ovb	ATGGAATCCTGTGCAAACAGATTC
TC9352-Ova	TGCTGACTAGGGAAAGAGAACTGG
TC9352-Ovb	ACAGCTAGAGCCACTTCCAGTTCT
TC9355-Ova	AAACAGGCATGGGAAGGAAAGCCT
TC9355-Ovb	ATGCAGCAGCATCCACAGGCTTTC
TC9372-Ova	TGGCCCGTTAAAGTTGCCACCTTC
TC9372-Ovb	AGTATCCGTCAATGGGGAAGGTGG
TC9393-Ova	ACATCCCCATTTGATGTCTCAGTC
TC9393-Ovb	GTGAAGGACATGACGGGACTGAGA
TC9437-Ova	AACTGTACTGCCGTGAGAAAGCAA
TC9437-Ovb	GCTTCAGGGGTTACTTTTGCTTTC
TC9445-Ova	GTGTATTGAAGAGGGGAGTGGGGG
TC9445-Ovb	TCACTTCGTTTCCTCCCCCCCACT
TC9472-Ova	CATTTCTGCTGGACAGGGTGAAAG
TC9472-Ovb	CAAAGGAGCTGGATTTCTTTCACC
TC9511-Ova	GTGGAGTCTATATGGCCTCATGAC
TC9511-Ovb	GTCACCGTATTGAGATGTCATGAG
TC9512-Ova	TGTGGCTGACTGACAAAATTCAAG
TC9512-Ovb	AGCCACCCCAAAATCTCTTGAATT
TC9563-Ova	ACCAAGACCGACACTTAACAGTGC
TC9563-Ovb	AAGATGAGACCTGTCAGCACTGTT
TC9576-Ova	TGAACCGCACTCCTTTTCCACATC
TC9576-Ovb	TCTGTGATGCGTATCAGATGTGGA
TC9706-Ova	GGTGAGGCTGTGATTTTTAGGTGG
TC9706-Ovb	TCATGATATGGTTCATCCACCTAA
TC9744-Ova	AGTTGGGGATATTGGGTTCCATGG
TC9744-Ovb	CTCTTCATTCGATGCACCATGGAA
TC9754-Ova	CAACAGCCGTATTCATTAGATTGC
TC9754-Ovb	CTGCTTCCACAGGAATGCAATCTA
TC9776-Ova	GTCTCCTCTTCAGCTCATCCCATC
TC9776-Ovb	ACGCAAATTGAAGCTCGATGGGAT
TC9827-Ova	CTTTTCGTCGCTCTTGCTCTGATC
TC9827-Ovb	GGTAAAGGAGGGTCTAGATCAGAG
TC9838-Ova	GCACGAAAGAATCGTCCACAGTTG
TC9838-Ovb	CCAATGCTCCTATGACCAACTGTG
TC9851-Ova	AGTCCCTATCTCCACACCAAATCC
TC9851-Ovb	CTCGATATGCAAGGTGGGATTTGG
TC9935-Ova	CCAGGCAAGATCTCAAGGTTCATC
TC9935-Ovb	ATAAGCTTCAGCGCTGGATGAACC
TC10044-Ova	TGGCAACTTGTTGGTTAGAGTTTC
TC10044-Ovb	GAGGAGAATTCTTTTGGAAACTCT
TC10108-Ova	GCAAAAACACGTGAGGTCTCAGCA
TC10108-Ovb	CATCTGGTGGTATTGGTGCTGAGA
TC10222-Ova	TGTTACGAATGATGCAAAGCTTTC
TC10222-Ovb	CTAGTCCCCCTAAATGGAAAGCTT
TC10252-Ova	CATGGCTTCCTGTTTCTCCATCAC
TC10252-Ovb	GGGACTAATGAAACAAGTGATGGA
TC10322-Ova	CCATGAGCTGCAGACTCGAGAAAC
TC10322-Ovb	TGAGTTAACTTCCGGCGTTTCTCG
TC10324-Ova	GGCTTCAAGTAGGCAAAGTAAATC
TC10324-Ovb	TGGAGATTCAGTGGGTGATTTACT
TC10328-Ova	TCATGAAGCGTCTACCCCAATCTC
TC10328-Ovb	CTCTTTGAGGCTCACAGAGATTGG
TC11005-Ova	TGCTCTGTTGATCAGGATATGTTG
TC11005-Ovb	GAAGCTACATAACTCTCAACATAT
TC14029-Ova	CTCAAAATTGGGGTGGGTCGTGAT
TC14029-Ovb	AAGCTTCTACTGAGTCATCACGAC
TC14129-Ova	TGTCCTCTAACAAGACCTTCAGTA
TC14129-Ovb	CGATTGCTATGGATGGTACTGAAG
TC14131-Ova	CAAGTCCCCAACCAATATAAAGGG
TC14131-Ovb	GCCATTGGGATTACCTCCCTTTAT
TC14132-Ova	GATCAGACTAGGTGGACGAACTTC
TC14132-Ovb	ACTCAACAACATTGCCGAAGTTCG
TC14205-Ova	GTTAAGAGACCAAGCCCAACCAAC
TC14205-Ovb	ACTCCCTGAGGCACCAGTTGGTTG
TC14219-Ova	AGCTGCGGGATATGGGATTGGCGA
TC14219-Ovb	TGTTAGAACCTGTGGCTCGCCAAT
TC14337-Ova	GGGTGGAGAGGATATTTTGGTCAC
TC14337-Ovb	TGTCTAGGTTCTGACAGTGACCAA
TC14373-Ova	TTCCCTCTGGATGTACCTTGACTA
TC14373-Ovb	GGGAAGTCAAAGGTTCTAGTCAAG
TC14378-Ova	ATTCGGATGGGGAAAGTTTGTCGG
TC14378-Ovb	AGATATCCCAAGGCTCCCGACAAA
TC14391-Ova	CTTTAGCCCATGTGCAAAAGTCGC
TC14391-Ovb	AGTGCATGGTCTTGCAGCGACTTT
TC14392-Ova	CTTGAACTCAAATGTCATATTGCG
TC14392-Ovb	ATGGGCACCTTCTTCACGCAATAT
TC14418-Ova	CGTGTATATACCCTTTTAACCTGG
TC14418-Ovb	ACAAGGAACAGCCACACCAGGTTA
TC14475-Ova	ACCAATTTTGGCAGCCATCTCCTC
TC14475-Ovb	GAGTTTGTTTTGAGACGAGGAGAT
TC14543-Ova	ATCCGAGATTAGAGAGTACGGGAA
TC14543-Ovb	TCCACCTACACCAGTATTCCCGTA
TC14602-Ova	AGGCAGGCTACAGTTTTGTTGGTC
TC14602-Ovb	CCTACTGGTATGTGGAGACCAACA
TC14633-Ova	TGACTTAATTCTCCCTGTGCAATA
TC14633-Ovb	GGCAACGAGAAGGAAATATTGCAC
TC14660-Ova	GTGTTGATCATCAGCCAGAGAGAG
TC14660-Ovb	TCGACACTCTTCCGTGCTCTCTCT
TC14686-Ova	AACATAACACGCTGCCGAGTAGTA
TC14686-Ovb	GGAGAAATACGCCTGTTACTACTC
TC14720-Ova	GAGTGACAACCTTCAAGTGTAAGG
TC14720-Ovb	TGCTTGCTCCTTACGACCTTACAC
TC14740-Ova	ATCCCTGGTGTAGTTCATTCTCTC
TC14740-Ovb	TCAGGGAATACAATGGGAGAGAAT
TC14768-Ova	TGATTAAGGTAGTGGGAAGCACCT
TC14768-Ovb	TTCTGCTCCTGACATGAGGTGCTT
TC14816-Ova	CCTACACACTGAAGAGAATCAGGG
TC14816-Ovb	ACATGGTAGCTAGGGTCCCTGATT
TC14829-Ova	ATACCCGGCAGGTTTGCCTCCTGC
TC14829-Ovb	GTTAACTACCAAAGCCGCAGGAGG
TC14835-Ova	ACCTCCACCAACAAAGAATGACTG
TC14835-Ovb	GCAAATGGGTGTCTTCCAGTCATT
TC14836-Ova	CTCCTCCCCATTAAAGGATCCAAC
TC14836-Ovb	AGCTTCAACCATCCGAGTTGGATC
TC14942-Ova	AGGCTAGTAAGCCTCAGATACTCA
TC14942-Ovb	GCAAGACAAGACCATTTGAGTATC
TC14967-Ova	AATTCTGGGTGGCACTCCATTCTC
TC14967-Ovb	GTGTACATGCTGCGACGAGAATGG
TC14979-Ova	AACGGCTTGTTCAGAGTTCAGTTT
TC14979-Ovb	CACACTAGTCACCTTAAAACTGAA
TC15022-Ova	ATGGAGAAATTCCCAGTTCAATTG
TC15022-Ovb	AGCTTGGCAAGAGATCCAATTGAA
TC15023-Ova	GTTTGTGGAAGCGCAAGGCTGATA
TC15023-Ovb	CAATGTCTTAATGCGGTATCAGCC
TC15053-Ova	CGCTAGATATGGATTCTACTGAGG
TC15053-Ovb	GCTTTGCGTAAAGTCTCCTCAGTA
TC15062-Ova	GGTCTTTGACTGTACTAGATCAGG
TC15062-Ovb	GTAGTGGCATTCTTTTCCTGATCT
TC15075-Ova	CTATGTGTTTAGGACCATCTGCAG
TC15075-Ovb	CCTTTCATCACCGCGACTGCAGAT
TC15083-Ova	AGCTGGAAATTCGTGGCGAAGATG
TC15083-Ovb	TGCACTTGTTGCGAGGCATCTTCG
TC15181-Ova	TCCCTTCTGATATTCCAACCTTCC
TC15181-Ovb	AGCCAGGGCTTTATTGGGAAGGTT
TC15218-Ova	ACCTACCGCAAAAAGCGAACTCCA
TC15218-Ovb	TCTCAACCGATAGAACTGGAGTTC
TC15224-Ova	CTCAGCAGGTTGAAATATTAGAAC
TC15224-Ovb	AATGCAGGGAACTGCTGTTCTAAT
TC15289-Ova	TTGACGCCATCCCTTTGGAAGATG
TC15289-Ovb	ATGATAGGAAGTGTGACATCTTCC
TC15405-Ova	ATTCACTGGACGTCTGCTGCACAA
TC15405-Ovb	CCTCAAGCAAGGAAACTTGTGCAG
TC15479-Ova	CAATCATTATGTGGGATGACCAAC
TC15479-Ovb	TTTCCCTCTCCGATAGGTTGGTCA
TC15591-Ova	ACAACACAGTAACAAGGTGCGTTT
TC15591-Ovb	CATCAAGTGCTTGGTTAAACGCAC
TC15784-Ova	GTTATCTGCCGACTCTCATGATTC
TC15784-Ovb	TTACGCTAATCAGAGGGAATCATG
TC15808-Ova	CCAAAGGATGGAAGTCCTTGATTG
TC15808-Ovb	GCGAGAATTCCAGGAACAATCAAG
TC15819-Ova	ACACCCCAGAAGACATGGAATCCA
TC15819-Ovb	CTTTACAACTCCGACTTGGATTCC
TC15995-Ova	ACAGGGACAAGATTCCAGTCCCAG
TC15995-Ovb	GTTCTTGACGTAGGGGCTGGGACT
TC16155-Ova	ATTGAGTCGGTGGGTAAGGAGGAT
TC16155-Ovb	CAAACACCATCGGCTTATCCTCCT
TC24406-Ova	TGGGCGGGATTATCAAGTTAGAAC
TC24406-Ovb	CTGCCATTACACCATTGTTCTAAC
TC20920-Ova	GAACCAATAAGTGTTGCCACAGCC
TC20920-Ovb	TATTCATGCTTGGCCCGGCTGTGG
TC32786-Ova	GTTGATACTGTGGTGCTCCGTAGT
TC32786-Ovb	CATATCAAATAGGCACACTACGGA
TC21211-Ova	GCCAAAAGCCCTAGAAGAGATTCT
TC21211-Ovb	CTGAGCTTATTAAGCTAGAATCTC
TC26369-Ova	GGAGAAAATGTTGGGGCATGGAGG
TC26369-Ovb	GTTCATAGCATGCCTGCCTCCATG
TC21486-Ova	TTGGACGACAGTGAGTGGTTGGTT
TC21486-Ovb	CCACCATAAGTCACCAAACCAACC
TC24814-Ova	GGGAGAGTTGCTTACTTCCAGGAA
TC24814-Ovb	CCATCTCCCAACATTCTTCCTGGA
TC27019-Ova	TTCCATGCACGCTTCTCAATCAAG
TC27019-Ovb	CTCACAGTCCATGGAACTTGATTG
TC27021-Ova	CTGCTGTAAGCAGGTATGTGTGAT
TC27021-Ovb	CTGCAGAGTAACTGCAATCACACA
TC21654-Ova	GCTAGAGCAAAGAAGGTTAGTTTG
TC21654-Ovb	ACCACACAAGTTCTCACAAACTAA
TC29760-Ova	TGGATTAAGGGAACGTTGGGGTTC
TC29760-Ovb	TTACAACGGTCCCATGGAACCCCA
TC21880-Ova	GACTGAAGCCAACTCTGCCAAGTA
TC21880-Ovb	CTCAACAGATTTCTACTACTTGGC
TC27360-Ova	TAGTTGTGTTGGAGAGAGCACTTG
TC27360-Ovb	CGTAGTTCTTACTACTCAAGTGCT
TC27371-Ova	TGGATTATGGTAACATTGTGTTGC
TC27371-Ovb	GAGCTCTTGATGCTTGGCAACACA
TC26551-Ova	GTGCAGAAGCACTTCTTCCTTTCC
TC26551-Ovb	GCCAGTACCACATACTGGAAAGGA
TC26594-Ova	CCATTTTCGGTCGAAAGTTTCTGT
TC26594-Ovb	TTTTGCGACTTAGCAGACAGAAAC
TC21922-Ova	GTCTGGACTTCAGTGTTTGCTTAC
TC21922-Ovb	CGTAGCATCAACTTAGGTAAGCAA
TC23935-Ova	CGTCAACCTGCTCAATCTGAGGAA
TC23935-Ovb	CCAAAGGCTGGAAAAATTCCTCAG
TC28249-Ova	ATGCTTGGAAACCAACTTGGAAAG
TC28249-Ovb	CAGATGCAGCAAGCATCTTTCCAA
TC33100-Ova	TCTCCTTGTCAATGACACTCCCTG
TC33100-Ovb	TATATTGGCAGGGACTCAGGGAGT
TC22565-Ova	TTGCATAGCATGCCTACCGTTTCA
TC22565-Ovb	TCAGCGCTTATTGAGTTGAAACGG
TC22599-Ova	TGCCTGGAAGATGTAATCAGCTTG
TC22599-Ovb	AAGCAGCTACACAAGTCAAGCTGA
TC30032-Ova	GTCTTTTGTAGAATTGAGAAGTGG
TC30032-Ovb	ACATAAACAACCCCGGCCACTTCT
TC31785-Ova	GCCCTCACCAAATGAATCTAGTAC
TC31785-Ovb	CAGACAATCTAGGATAGTACTAGA
TC22820-Ova	CGTACGGTGCAAATATCTAATGGG
TC22820-Ovb	CCATAACTGTGGCTAGCCCATTAG
TC32137-Ova	CCTTGCAAATGCTTGGTCCAACGG
TC32137-Ovb	ACTGAACCTTGCATCCCCGTTGGA
TC20267-Ova	TTCTAATTCGACGAAACATCTCTC
TC20267-Ovb	TAGTTGTTCCCATGGGGAGAGATG
TC26722-Ova	AGGACTAAATCAGTCCAAGAGGGT
TC26722-Ovb	CTCCTGTAGTCTGTAAACCCTCTT
TC30722-Ova	GATGGGTTTGTACATGCAACGTTC
TC30722-Ovb	AATGAGGATGATCCATGAACGTTG
TC28874-Ova	GACAGATCTACATCATAAATGACG
TC28874-Ovb	CCCATTTTTGCTGTGGCGTCATTT
